# Supplementary material for: Seasonal Climate Impacts on Vocal Activity in Two Neotropical Nonpasserines
Source: MDPI journal article supplement (doi:10.3390/d13070319), 2021-07-14
Supplement: s1 [file s1]

Archive with 1 entries (1 files):
- diversity-1249360-SI.pdf
